# Supplementary material for: Characterisation of Phage Susceptibility Variation in Salmonella enterica Serovar Typhimurium DT104 and DT104b
Source: MDPI journal article supplement (doi:10.3390/microorganisms9040865), 2021-04-17

Supplementary Table S1. WGS-based identification of antimicrobial resistance determinants.

| Strain ID   | Phage Type | Resistance determinants                                                                                                                               |
|-------------|------------|-------------------------------------------------------------------------------------------------------------------------------------------------------|
| DP_F10      | DT104b     | <i>aac(6')-Iaa</i><br><i>aadA2b</i><br><i>sul1</i><br><i>tet(G)</i><br><i>floR</i><br><i>blaCARB-2</i>                                                |
|             |            | Amikacin, Tobramycin<br>Streptomycin<br>Sulfamethoxazole<br>Tetracycline<br>Chloramphenicol<br>Ampicillin                                             |
| DP_N16      | DT104b     | <i>aac(6')-Iaa</i><br><i>aadA2b, aph(6)-Id, aph(3'')-Ib</i><br><i>sul1, sul2</i><br><i>tet(G)</i><br><i>floR</i><br><i>blaCARB-2</i><br><i>dfrA14</i> |
|             |            | Amikacin, Tobramycin<br>Streptomycin<br>Sulfamethoxazole<br>Tetracycline<br>Chloramphenicol<br>Ampicillin<br>Trimethoprim                             |
| DP_N28      | DT104b     | <i>aac(6')-Iaa</i><br><i>aadA2b, aph(6)-Id, aph(3'')-Ib</i><br><i>sul1, sul2</i><br><i>tet(G)</i><br><i>floR</i><br><i>blaCARB-2</i><br><i>dfrA14</i> |
|             |            | Amikacin, Tobramycin<br>Streptomycin<br>sulfamethoxazole<br>Tetracycline<br>Chloramphenicol<br>Ampicillin<br>Trimethoprim                             |
| JE_2727     | DT104b     | <i>aac(6')-Iaa</i><br><i>aadA2b</i><br><i>sul1</i><br><i>tet(G)</i><br><i>floR</i><br><i>blaCARB-2</i>                                                |
|             |            | Amikacin, Tobramycin<br>Streptomycin<br>Sulfamethoxazole<br>Tetracycline<br>Chloramphenicol<br>Ampicillin                                             |
| DT104b ref. | DT104b     | <i>aac(6')-Iaa</i>                                                                                                                                    |
|             |            | Amikacin, Tobramycin                                                                                                                                  |
| JM_04.26    | DT104      | <i>sul1</i><br><i>aadA2b</i><br><i>aac(6')-Iaa</i>                                                                                                    |
|             |            | Sulfamethoxazole<br>Streptomycin<br>Amikacin, Tobramycin                                                                                              |
| MC_04-0529  | DT104      | <i>aadA2b</i><br><i>aac(6')-Iaa</i><br><i>sul1</i><br><i>tet(G)</i><br><i>floR</i><br><i>blaCARB-2</i>                                                |
|             |            | Streptomycin<br>Amikacin, Tobramycin<br>Sulfamethoxazole<br>Tetracycline<br>Chloramphenicol<br>Ampicillin                                             |
| R13         | DT104      | <i>aac(6')-Iaa</i><br><i>aadA2b</i><br><i>sul1</i><br><i>tet(G)</i><br><i>floR</i><br><i>blaCARB-2</i>                                                |
|             |            | Amikacin, Tobramycin<br>Streptomycin<br>Sulfamethoxazole<br>Tetracycline<br>Chloramphenicol<br>Ampicillin                                             |
| TM75-404    | DT104      | <i>aac(6')-Iaa</i>                                                                                                                                    |
|             |            | Amikacin, Tobramycin                                                                                                                                  |
| DT104 ref.  | DT104      | <i>aadA2b</i><br><i>aac(6')-Iaa</i><br><i>sul1</i><br><i>tet(G)</i><br><i>floR</i><br><i>blaCARB-2</i>                                                |
|             |            | Streptomycin<br>Amikacin, Tobramycin<br>Sulfamethoxazole<br>Tetracycline<br>Chloramphenicol<br>Ampicillin                                             |
| LT2         | DT4        | <i>aac(6')-Iaa</i>                                                                                                                                    |
|             |            | Amikacin, Tobramycin                                                                                                                                  |

Supplementary Table S2. Distribution of potential genes coding for phage receptors among all strains of DT104 and DT104b

[illegible]

**Supplementary Figure S1.** (A) ML phylogenetic tree of *Salmonella* Typhimurium DT104 and DT104b strains based on SNPs of prophage Salmon\_118970\_sal3; (B) ML phylogenetic tree of *Salmonella* Typhimurium DT104 and DT104b strains based on SNPs of prophage Salmon\_ST64B; (C) ML phylogenetic tree of *Salmonella* Typhimurium DT104 and DT104b strains based on SNPs of prophage Gifsy-2; (D) ML phylogenetic tree of *Salmonella* Typhimurium DT104 and DT104b strains based on SNPs of prophage Gifsy-1.

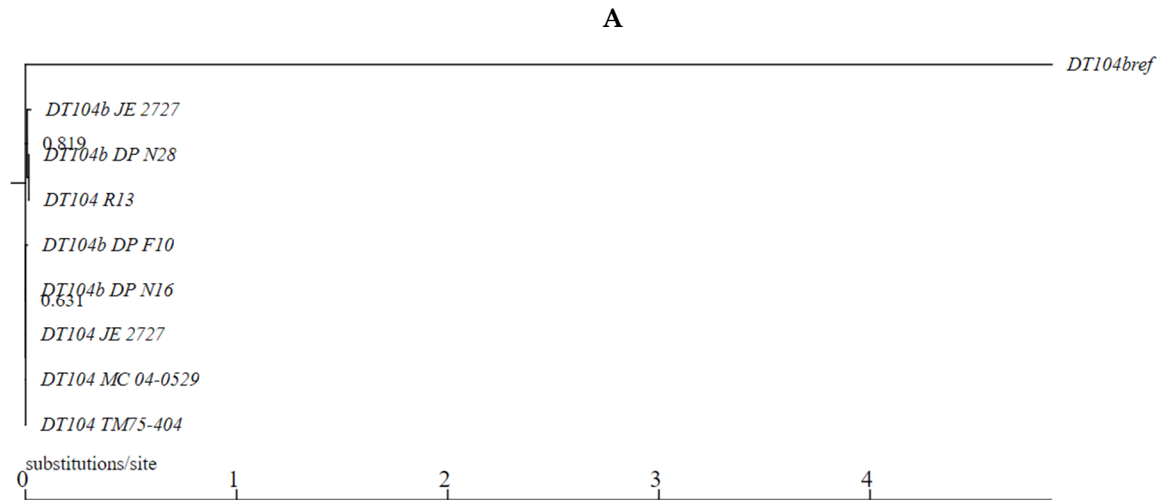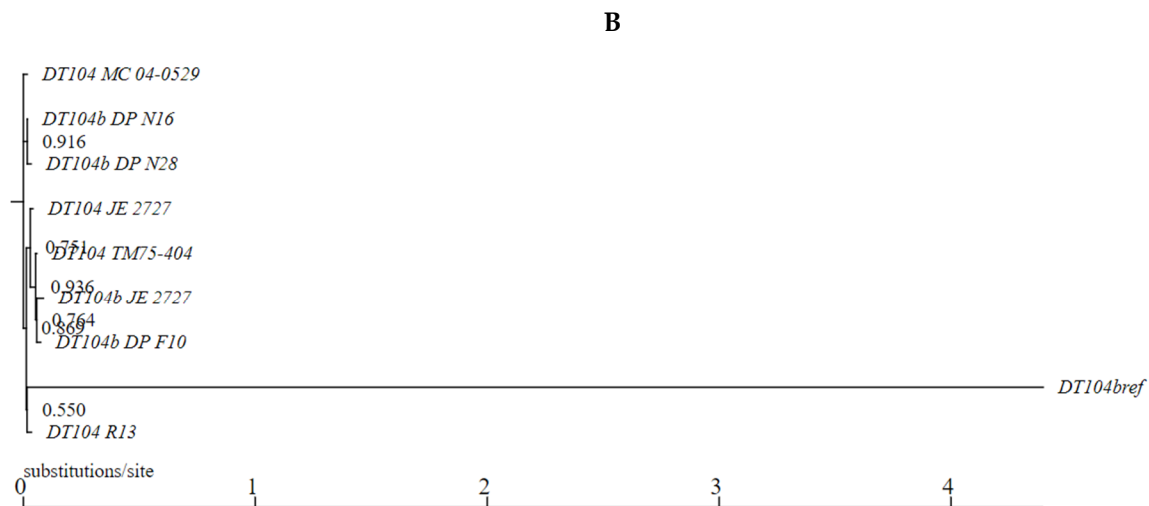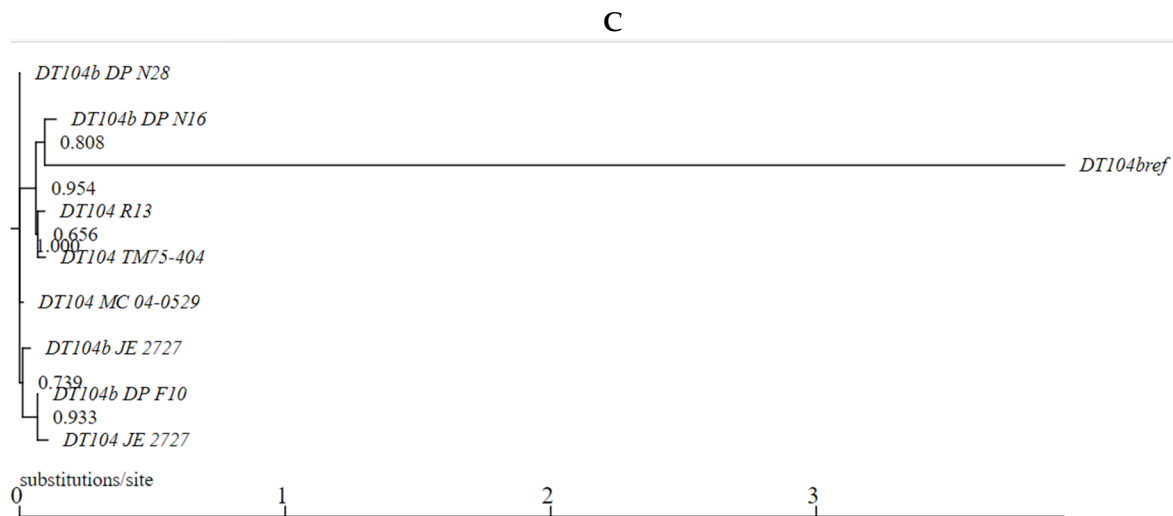

# D

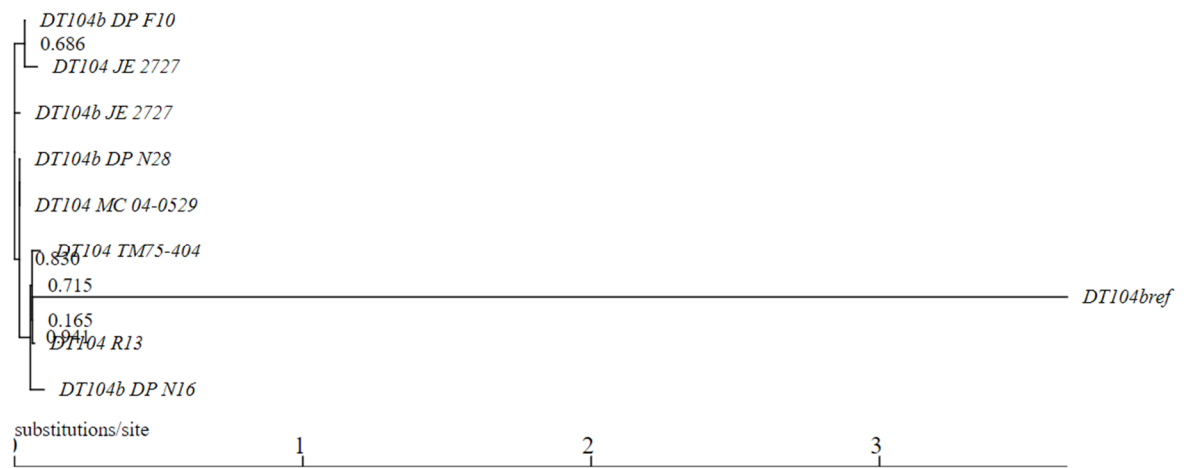

Supplement: s1 [file s1]
